# Supplementary material for: A MnO2 nanosheet-mediated photo-controlled DNAzyme for intracellular miRNA cleavage to suppress cell growth
Source: Royal Society of Chemistry journal article supplement (doi:10.1039/d1an00406a), 2021-01-01
Supplement: d1an00406a1.pdf [file d1an00406a1.pdf]

## Electronic Supplementary Information (ESI)

### **MnO<sub>2</sub> Nanosheet-Mediated Photo-Controlled DNzyme for Intracellular miRNA Cleavage to Suppress Cell Growth**

Yehua Liu, Zhenxiang Liu, Ruiting Liu, Kemin Wang, Hui Shi\* and Jin Huang\*

State Key Laboratory of Chemo/Biosensing and Chemometrics, College of Chemistry and Chemical Engineering, Key Laboratory for Bio-Nanotechnology and Molecular Engineering of Hunan Province, Hunan University, Changsha 410082, P. R. China.

\*Email: jinhuang@hnu.edu.cn; huishi\_2009@hnu.edu.cn

#### **Contents:**

|                                                                                                |    |
|------------------------------------------------------------------------------------------------|----|
| <b>Table S1:</b> Sequences used in this work.....                                              | 1  |
| <b>Figure S1.</b> Fluorescence analysis of the PD response to UV light.....                    | 2  |
| <b>Figure S2.</b> Atomic force microscopy (AFM) images of the MnO <sub>2</sub> nanosheets..... | 3  |
| <b>Figure S3.</b> Infrared (IR) spectrum of the MnO <sub>2</sub> nanosheets.....               | 4  |
| <b>Figure S4.</b> Zeta-potential analysis of the MnO <sub>2</sub> nanosheets.....              | 5  |
| <b>Figure S5.</b> Quantitative analysis of the MnO <sub>2</sub> nanosheets.....                | 6  |
| <b>Figure S6.</b> Fluorescence quenching analysis.....                                         | 7  |
| <b>Figure S7.</b> The stability test of the PD and NPD by fluorescence analysis.....           | 8  |
| <b>Figure S8.</b> The stability test of the modified PD with 3'-3'-dT cap in FBS.....          | 9  |
| <b>Figure S9.</b> Cytotoxicity of different concentrations of MnO <sub>2</sub> nanosheets..... | 10 |

**Table S1:** Sequences used in this work.

| Name            | Sequences (5' → 3')                                                                 |
|-----------------|-------------------------------------------------------------------------------------|
| DNAzyme         | TCAACATCAGTCCGAGCCGGTCGAAGATAAGCTA                                                  |
| DNAzyme-dT      | TCAACATCAGTCCGAGCCGGTCGAAGATAAGCTAdT                                                |
| FAM-DNAzyme-dT  | FAM-TCAACATCAGTCCGAGCCGGTCGAAGATAAGCTAdT                                            |
| miRNA-21        | UAGCUUAUCAGACUGAUGUUGA                                                              |
| FAM-miR-21-BHQ1 | FAM - UAGCUUAUCAGACUGAUGUUGA-BHQ1                                                   |
| Cy3-miR-21-BHQ2 | Cy3- UAGCUUAUCAGACUGAUGUUGA-BHQ2                                                    |
| FAM-PD -BHQ1    | FAM-TAGCTT/iPCLink/ATCAGACTGATCAACTTTTTTCAACATCAGTTCC<br>GAGCCGGTCGAAGATAAGCTA-BHQ1 |
| miR-21 forward  | ACACTCCAGCTGGGTAGCTTATCAGACTGA                                                      |
| miR-21 reverse  | CTCAACTGGTGTCTGGAGTCGGCAATTCA GTTGAGTCAACATC                                        |
| U6 forward      | CTCGCTTCGGCAGCACA                                                                   |
| U6 reverse      | AACGCTTCACGAATTTGCGT                                                                |

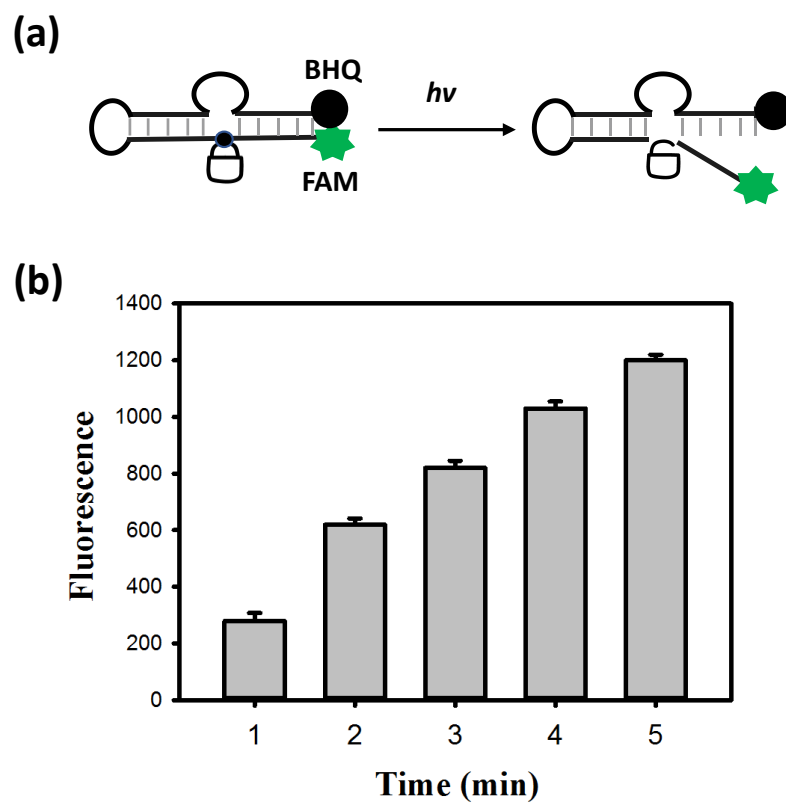

**Figure S1.** Fluorescence analysis of the PD response to UV light. (a) Schematic depicting the mechanism of the photo-responsive of PD. (b) Real-time fluorescence monitoring of the PD shining with UV light.

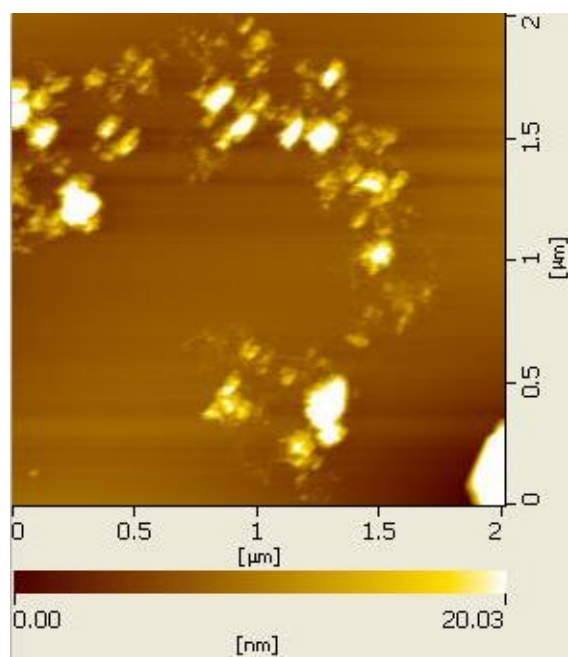

**Figure S2.** Atomic force microscopy (AFM) images of the MnO<sub>2</sub> nanosheets.

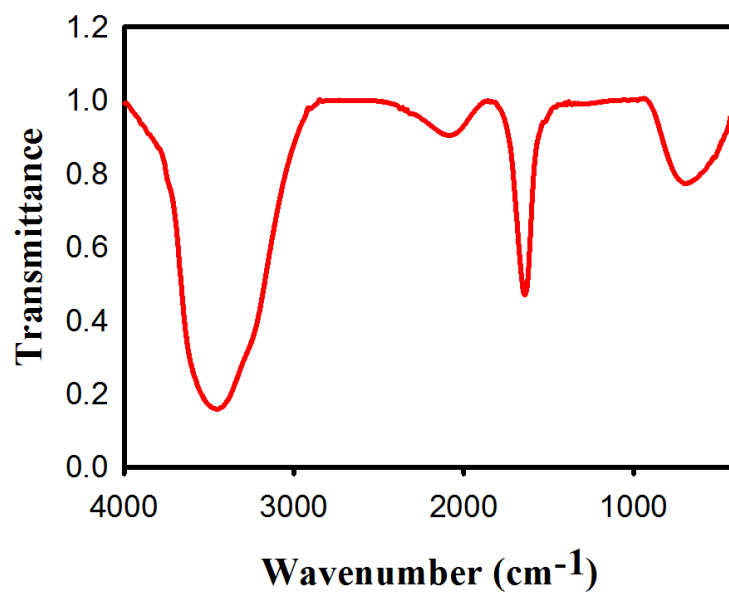

**Figure S3.** Infrared (IR) spectrum of the MnO<sub>2</sub> nanosheets. The absorption peak below 1000 denotes a band of Mn-O.

|                             | Mean (mV)     | Area (%) | Width (mV) |
|-----------------------------|---------------|----------|------------|
| Zeta Potential (mV): -30.1  | Peak 1: -30.1 | 100.0    | 7.53       |
| Zeta Deviation (mV): 7.53   | Peak 2: 0.00  | 0.0      | 0.00       |
| Conductivity (mS/cm): 0.167 | Peak 3: 0.00  | 0.0      | 0.00       |

Result quality : See result quality report

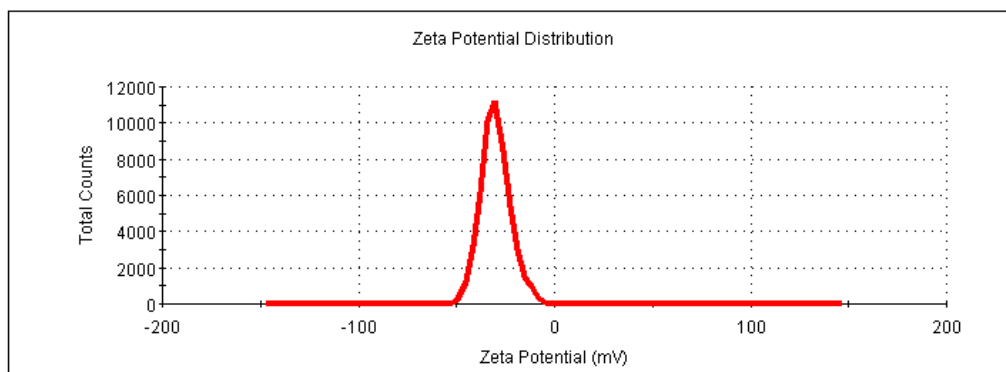

Figure S4. Zeta-potential analysis of the MnO<sub>2</sub> nanosheets.

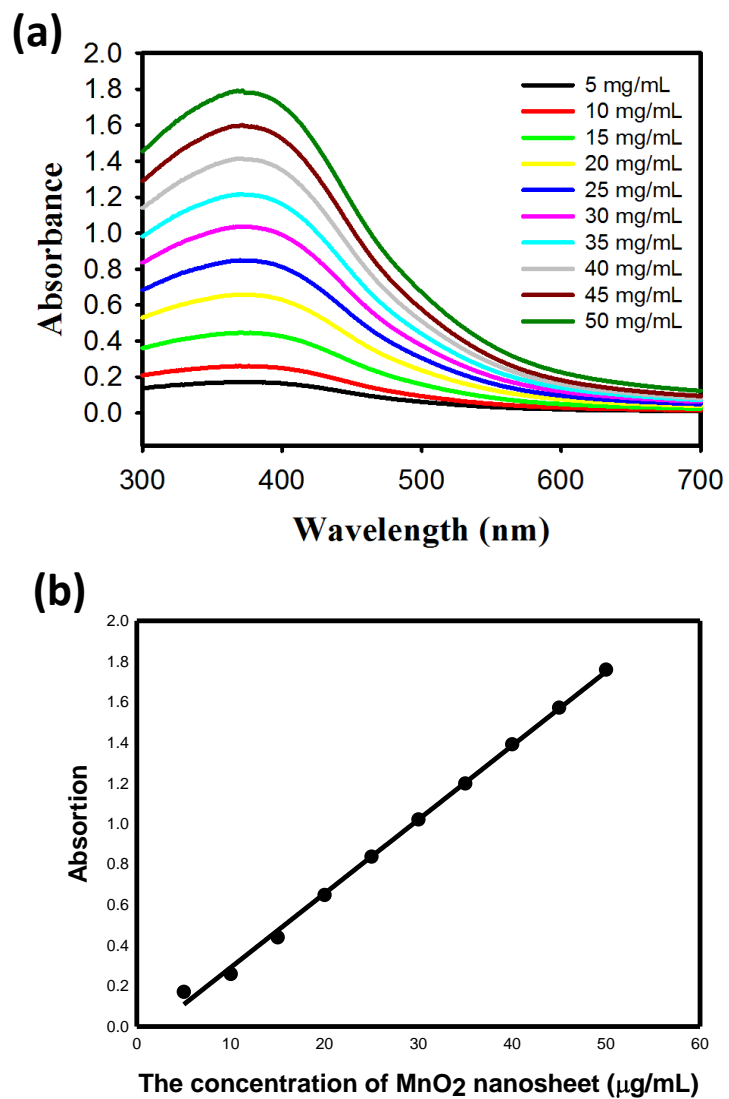

**Figure S5.** Quantitative analysis of the MnO<sub>2</sub> nanosheets. (a) The UV-Vis absorption spectra of different concentrations of the MnO<sub>2</sub> nanosheets. (b) The standard curve can be drawn for quantitative analysis of MnO<sub>2</sub> nanosheets.

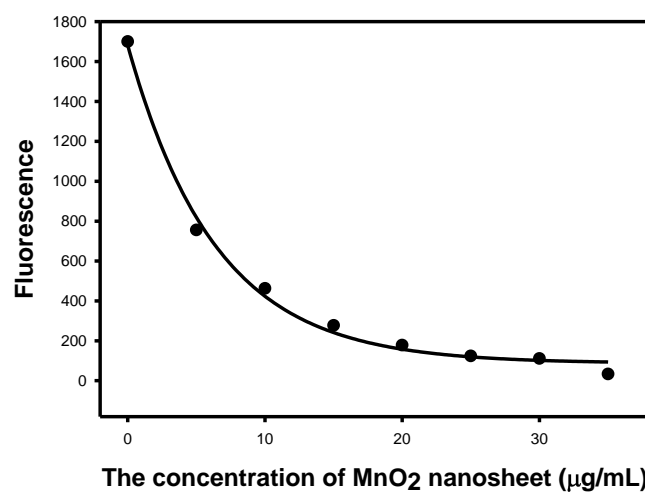

**Figure S6.** Fluorescence quenching analysis. The experiment of quenching fluorescence by different concentrations of MnO<sub>2</sub> nanosheets and 100 nM PD.



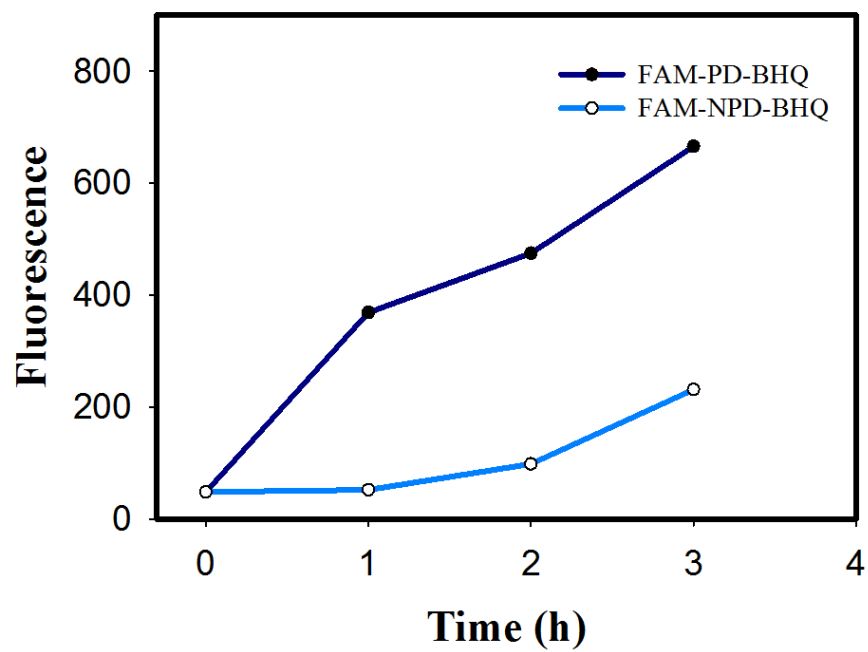

**Figure S7.** The stability test of the PD and NPD by fluorescence analysis. FAM-PD-BHQ and FAM-NPD-BHQ incubated with DNase I.

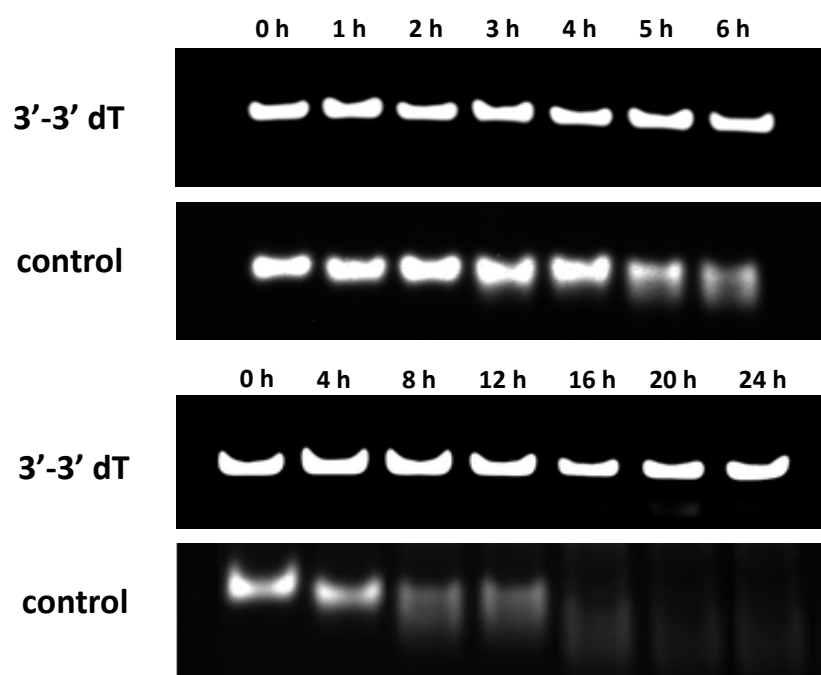

**Figure S8.** The stability test of the modified PD with 3'-3'-dT cap in FBS. Control denotes PD without 3'-3'-dT cap.

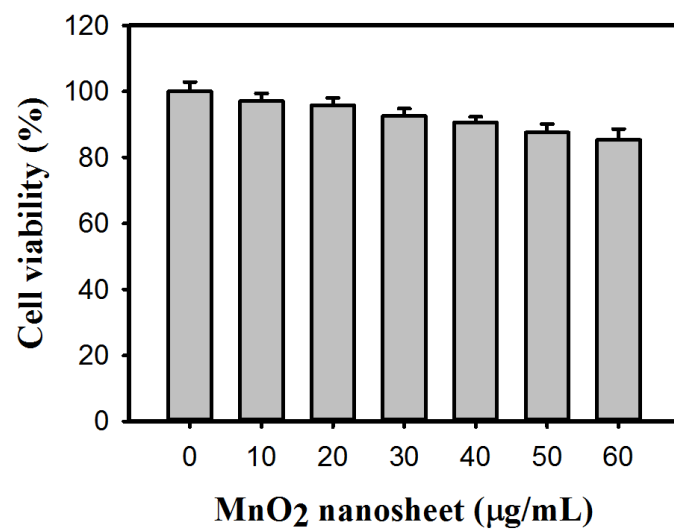

**Figure S9.** Cytotoxicity of different concentrations of MnO<sub>2</sub> nanosheets. All the experiments were done three times in parallel.
